# Supplementary material for: The protective mechanisms of macroalgae Laminaria japonica consumption against lipid metabolism disorders in high-fat diet-induced hyperlipidemic rats
Source: Royal Society of Chemistry journal article supplement (doi:10.1039/d0fo00065e), 2020-01-01
Supplement: d0fo00065e1.pdf [file d0fo00065e1.pdf]

## Supplementary materials

**Table S1**

Dietary energy distribution of the normal-fat diet (NFD, #D12450B) and high-fat diet (HFD, #D12451) purchased from Research Diets Co. Ltd. (New Brunswick, NJ, USA).

| <b>Nutritional<br/>Components</b> | <b>Normal-fat diet<br/>(10% dietary fat)</b> | <b>High-fat diet<br/>(45% dietary fat)</b> |
|-----------------------------------|----------------------------------------------|--------------------------------------------|
| Protein                           | 20                                           | 20                                         |
| Carbohydrate                      | 70                                           | 35                                         |
| Fat                               | 10                                           | 45                                         |
| Total kcal/g                      | 100                                          | 100                                        |

**Table S2**

Composition of the normal-fat diet (NFD, #D12450B) and high-fat diet (HFD, #D12451) used in the animal experiment.

| Ingredients         | Normal-fat diet (10% dietary fat) |      | High-fat diet (45% dietary fat) |      |
|---------------------|-----------------------------------|------|---------------------------------|------|
|                     | g                                 | kcal | g                               | kcal |
| Casein, 30 mesh     | 200                               | 800  | 200                             | 800  |
| L-cystine           | 3                                 | 12   | 3                               | 12   |
| Corn starch         | 315                               | 1260 | 72.8                            | 291  |
| Maltodextrin 10     | 35                                | 140  | 100                             | 400  |
| Sucrose             | 350                               | 1400 | 172.8                           | 691  |
| Cellulose, BW200    | 50                                | 0    | 50                              | 0    |
| Soybean oil         | 25                                | 225  | 25                              | 225  |
| Lard                | 20                                | 180  | 177.5                           | 1598 |
| Mineral mix S10026  | 10                                | 0    | 10                              | 0    |
| Dicalcium phosphate | 13                                | 0    | 13                              | 0    |
| Calcium carbonate   | 5.5                               | 0    | 5.5                             | 0    |
| Potassium citrate   | 16.5                              | 0    | 16.5                            | 0    |
| Vitamin mix V10001  | 10                                | 40   | 10                              | 40   |
| Choline bitartrate  | 2                                 | 0    | 2                               | 0    |
| FD&C yellow dye     | 0.05                              | 0    | -                               | -    |
| FD&C red dye        | -                                 | -    | 0.05                            | 0    |
